# Supplementary material for: Effects of Joint and Crack Geometry on Hydraulic Jacking in Lined and Unlined Spillways
Source: Atypon-hosted journal article supplement (doi:10.1061/jhend8.hyeng-13994), 2024-07-02
Supplement: supplemental_materials_jhend8.hyeng-13994_wahl.pdf [file supplemental_materials_jhend8.hyeng-13994_wahl.pdf]

## SUPPLEMENTAL MATERIALS

*ASCE Journal of Hydraulic Engineering*

# Effects of Joint and Crack Geometry on Hydraulic Jacking in Lined and Unlined Spillways

Tony L. Wahl and Bryan J. Heiner

**DOI:** 10.1061/JHEND8.HYENG-13994

© ASCE 2024

[www.ascelibrary.org](http://www.ascelibrary.org)

**Table S1.** Uplift pressure test data

| Type                | Key dimension  | Tilt   | Skew   | Offset | Gap   | Discharge per unit |       |       | Channel velocity |       | Boundary layer |            | Attached uplift |               |            |
|---------------------|----------------|--------|--------|--------|-------|--------------------|-------|-------|------------------|-------|----------------|------------|-----------------|---------------|------------|
|                     | $h_{ch}, R, r$ | $\phi$ | $\psi$ | $h$    | $s$   | $\beta$            | width | Depth | Velocity         | $N$   | $\alpha$       | $\alpha^*$ | head            | velocity head | $\Delta H$ |
|                     | mm             | deg.   | deg.   | mm     | mm    | -                  | $q$   | $y$   | $V$              | -     | -              | -          | m               | m             | m          |
| chamfer             | 6.35           | 0      | 0      | 9.87   | 7.24  | 0.73               | 0.587 | 7.16  | 8.20             | 9.14  | 1.028          | 0.536      | 3.429           | 1.839         | 1.308      |
|                     | 6.35           | 0      | 0      | 9.87   | 7.24  | 0.73               | 0.219 | 3.51  | 6.26             | 8.83  | 1.030          | 0.669      | 1.996           | 1.336         | 0.840      |
| radius              | 6.35           | 0      | 0      | 9.82   | 7.25  | 0.74               | 0.573 | 6.80  | 8.42             | 8.78  | 1.030          | 0.532      | 3.614           | 1.922         | 1.417      |
|                     | 6.35           | 0      | 0      | 9.82   | 7.25  | 0.74               | 0.387 | 5.49  | 7.04             | 8.77  | 1.030          | 0.572      | 2.530           | 1.447         | 1.003      |
|                     | 6.35           | 0      | 0      | 9.82   | 7.25  | 0.74               | 0.210 | 3.53  | 5.96             | 8.83  | 1.030          | 0.667      | 1.810           | 1.206         | 0.746      |
|                     | 6.35           | 0      | 0      | 5.61   | 7.16  | 1.28               | 0.210 | 3.51  | 5.98             | 8.21  | 1.034          | 0.529      | 1.824           | 0.965         | 0.554      |
| tilt away from flow | -              | -45    | 0      | 11.93  | 10.94 | 0.92               | 0.290 | 4.67  | 6.21             | 8.81  | 1.030          | 0.647      | 1.967           | 1.272         | 0.729      |
|                     | -              | -45    | 0      | 11.93  | 10.94 | 0.92               | 0.599 | 7.97  | 7.52             | 9.04  | 1.029          | 0.548      | 2.883           | 1.579         | 0.999      |
|                     | -              | -60    | 0      | 11.93  | 10.94 | 0.92               | 0.290 | 4.65  | 6.24             | 8.69  | 1.031          | 0.644      | 1.984           | 1.278         | 0.595      |
|                     | -              | -75    | 0      | 11.93  | 10.94 | 0.92               | 0.290 | 4.64  | 6.25             | 8.68  | 1.031          | 0.644      | 1.992           | 1.283         | 0.436      |
|                     | -              | -30    | 0      | 3.95   | 11.45 | 2.90               | 0.290 | 4.66  | 6.22             | 8.53  | 1.032          | 0.433      | 1.976           | 0.855         | 0.490      |
|                     | -              | -30    | 0      | 3.95   | 11.45 | 2.90               | 0.598 | 7.96  | 7.51             | 8.98  | 1.029          | 0.377      | 2.876           | 1.085         | 0.668      |
|                     | -              | -85    | 0      | 3.95   | 11.45 | 2.90               | 0.290 | 4.61  | 6.29             | 8.74  | 1.030          | 0.443      | 2.015           | 0.893         | 0.123      |
|                     | -              | -30    | 0      | 3.37   | 27.58 | 8.17               | 0.290 | 4.65  | 6.24             | 8.59  | 1.031          | 0.413      | 1.986           | 0.820         | 0.239      |
|                     | -              | -60    | 0      | 3.37   | 27.58 | 8.17               | 0.290 | 4.63  | 6.26             | 8.68  | 1.031          | 0.417      | 1.996           | 0.832         | 0.184      |
|                     | -              | -15    | 0      | 11.91  | 6.03  | 0.51               | 0.290 | 4.68  | 6.19             | 8.47  | 1.032          | 0.636      | 1.953           | 1.242         | 0.953      |
| -                   | -38            | 0      | 11.91  | 6.03   | 0.51  | 0.290              | 4.67  | 6.21  | 8.71             | 1.031 | 0.644          | 1.966      | 1.266           | 0.854         |            |
| tilt into flow      | -              | 15     | 0      | 11.70  | 5.98  | 0.51               | 0.358 | 5.47  | 6.54             | 8.37  | 1.033          | 0.594      | 2.181           | 1.296         | 1.121      |
|                     | -              | 22.5   | 0      | 11.64  | 6.30  | 0.54               | 0.354 | 5.53  | 6.40             | 8.06  | 1.035          | 0.580      | 2.089           | 1.211         | 1.135      |
|                     | -              | 30     | 0      | 11.30  | 6.30  | 0.56               | 0.354 | 5.53  | 6.40             | 8.07  | 1.035          | 0.573      | 2.089           | 1.198         | 1.147      |
|                     | -              | 37.5   | 0      | 11.47  | 6.30  | 0.55               | 0.433 | 6.41  | 6.74             | 8.34  | 1.033          | 0.556      | 2.319           | 1.290         | 1.276      |
|                     | -              | 37.5   | 0      | 11.47  | 6.30  | 0.55               | 0.354 | 5.53  | 6.40             | 8.07  | 1.035          | 0.576      | 2.089           | 1.205         | 1.181      |
|                     | -              | 45     | 0      | 11.37  | 6.30  | 0.55               | 0.434 | 6.43  | 6.75             | 8.53  | 1.032          | 0.561      | 2.325           | 1.304         | 1.291      |
|                     | -              | 30     | 0      | 11.30  | 6.30  | 0.56               | 0.434 | 6.43  | 6.75             | 8.53  | 1.032          | 0.560      | 2.325           | 1.301         | 1.233      |
|                     | -              | 37.5   | 0      | 11.79  | 6.30  | 0.53               | 0.434 | 6.43  | 6.75             | 8.53  | 1.032          | 0.568      | 2.325           | 1.321         | 1.274      |
|                     | -              | 45     | 0      | 11.37  | 6.30  | 0.55               | 0.210 | 3.58  | 5.87             | 8.43  | 1.032          | 0.686      | 1.758           | 1.206         | 1.041      |
|                     | -              | 45     | 0      | 11.37  | 1.27  | 0.11               | 0.165 | 2.82  | 5.86             | 8.06  | 1.035          | 0.738      | 1.753           | 1.294         | 0.951      |
|                     | -              | 37.5   | 0      | 11.37  | 6.30  | 0.55               | 0.210 | 3.58  | 5.87             | 8.42  | 1.032          | 0.686      | 1.758           | 1.206         | 1.020      |
|                     | -              | 37.5   | 0      | 11.47  | 6.30  | 0.55               | 0.354 | 5.53  | 6.40             | 8.07  | 1.035          | 0.576      | 2.089           | 1.205         | 1.173      |
|                     | -              | 30     | 0      | 11.30  | 6.30  | 0.56               | 0.165 | 2.82  | 5.87             | 8.07  | 1.035          | 0.737      | 1.754           | 1.293         | 0.899      |
|                     | -              | 30     | 0      | 11.30  | 6.30  | 0.56               | 0.210 | 3.58  | 5.87             | 8.42  | 1.032          | 0.685      | 1.758           | 1.204         | 0.962      |
| -                   | 30             | 0      | 11.30  | 6.30   | 0.56  | 0.354              | 5.53  | 6.40  | 8.07             | 1.035 | 0.573          | 2.089      | 1.198           | 1.138         |            |
| -                   | 45             | 0      | 5.37   | 19.47  | 3.63  | 0.354              | 5.53  | 6.40  | 8.07             | 1.035 | 0.435          | 2.091      | 0.910           | 0.651         |            |

| Type      | Key dimension  | Tilt   | Skew   | Offset | Gap   | Discharge per unit width |                   |           |              |      |          | Channel velocity head | Boundary layer velocity head | Attached uplift |            |
|-----------|----------------|--------|--------|--------|-------|--------------------------|-------------------|-----------|--------------|------|----------|-----------------------|------------------------------|-----------------|------------|
|           | $h_{ch}, R, r$ | $\phi$ | $\psi$ | $h$    | $s$   | $\beta$                  | $q$               | Depth $y$ | Velocity $V$ | $N$  | $\alpha$ | $\alpha^*$            | $h_v$                        | $h_v^*$         | $\Delta H$ |
|           | mm             | deg.   | deg.   | mm     | mm    | -                        | m <sup>2</sup> /s | cm        | m/s          | -    | -        | -                     | m                            | m               | m          |
| tilt into | -              | 45     | 0      | 5.37   | 19.47 | 3.63                     | 0.434             | 6.43      | 6.75         | 8.54 | 1.032    | 0.431                 | 2.326                        | 1.003           | 0.697      |
| flow      | -              | 30     | 0      | 5.49   | 19.47 | 3.55                     | 0.354             | 5.53      | 6.40         | 8.07 | 1.035    | 0.438                 | 2.090                        | 0.916           | 0.623      |
| (cont.)   | -              | 30     | 0      | 5.49   | 19.47 | 3.55                     | 0.434             | 6.43      | 6.75         | 8.53 | 1.032    | 0.434                 | 2.325                        | 1.010           | 0.666      |
|           | -              | 15     | 0      | 5.58   | 19.47 | 3.49                     | 0.354             | 5.53      | 6.40         | 8.06 | 1.035    | 0.441                 | 2.089                        | 0.921           | 0.565      |
|           | -              | 15     | 0      | 5.58   | 19.47 | 3.49                     | 0.434             | 6.43      | 6.75         | 8.53 | 1.032    | 0.436                 | 2.324                        | 1.015           | 0.596      |
| relief    | 45.2           | 0      | 0      | 12.11  | 10.77 | 0.89                     | 0.358             | 5.48      | 6.53         | 8.76 | 1.030    | 0.614                 | 2.176                        | 1.336           | 0.406      |
| slot      | 26.2           | 0      | 0      | 11.47  | 10.77 | 0.94                     | 0.358             | 5.48      | 6.53         | 8.76 | 1.030    | 0.603                 | 2.176                        | 1.311           | 0.581      |
|           | 13.7           | 0      | 0      | 11.47  | 10.77 | 0.94                     | 0.358             | 5.48      | 6.53         | 8.76 | 1.030    | 0.603                 | 2.176                        | 1.311           | 0.771      |
|           | 7.3            | 0      | 0      | 11.47  | 10.77 | 0.94                     | 0.358             | 5.48      | 6.53         | 8.76 | 1.030    | 0.603                 | 2.176                        | 1.311           | 0.854      |
|           | 2.8            | 0      | 0      | 11.47  | 10.77 | 0.94                     | 0.358             | 5.48      | 6.53         | 8.76 | 1.030    | 0.603                 | 2.176                        | 1.311           | 0.914      |
|           | 2.8            | 0      | 0      | 11.47  | 10.77 | 0.94                     | 0.213             | 3.66      | 5.81         | 8.54 | 1.032    | 0.686                 | 1.720                        | 1.180           | 0.728      |
|           | 50.4           | 0      | 0      | 11.91  | 6.02  | 0.51                     | 0.358             | 5.48      | 6.54         | 8.36 | 1.033    | 0.597                 | 2.180                        | 1.303           | 0.386      |
|           | 50.4           | 0      | 0      | 4.26   | 5.87  | 1.38                     | 0.213             | 3.66      | 5.81         | 8.54 | 1.032    | 0.484                 | 1.720                        | 0.833           | 0.054      |
|           | 50.4           | 0      | 0      | 4.26   | 5.87  | 1.38                     | 0.358             | 5.47      | 6.54         | 8.37 | 1.033    | 0.413                 | 2.181                        | 0.902           | 0.077      |
|           | 32.8           | 0      | 0      | 4.45   | 5.87  | 1.32                     | 0.354             | 5.53      | 6.40         | 8.06 | 1.035    | 0.405                 | 2.089                        | 0.846           | 0.129      |
|           | 32.8           | 0      | 0      | 4.45   | 5.87  | 1.32                     | 0.433             | 6.42      | 6.74         | 8.34 | 1.033    | 0.395                 | 2.319                        | 0.917           | 0.145      |
|           | 35.6           | 0      | 0      | 6.27   | 16.01 | 2.55                     | 0.210             | 3.58      | 5.88         | 8.44 | 1.032    | 0.556                 | 1.760                        | 0.978           | 0.174      |
|           | 48.4           | 0      | 0      | 6.24   | 3.21  | 0.51                     | 0.165             | 2.82      | 5.86         | 8.06 | 1.035    | 0.591                 | 1.753                        | 1.036           | 0.159      |
|           | 29.0           | 0      | 0      | 5.59   | 3.21  | 0.57                     | 0.165             | 2.82      | 5.86         | 8.06 | 1.035    | 0.567                 | 1.753                        | 0.994           | 0.243      |
|           | 9.9            | 0      | 0      | 5.81   | 3.21  | 0.55                     | 0.165             | 2.82      | 5.86         | 8.06 | 1.035    | 0.575                 | 1.753                        | 1.008           | 0.605      |
| skewed    | -              | 0      | 10     | 11.65  | 2.94  | 0.25                     | 0.354             | 5.55      | 6.38         | 8.00 | 1.035    | 0.577                 | 2.079                        | 1.199           | 0.997      |
| (insert)  | -              | 0      | 10     | 11.65  | 2.94  | 0.25                     | 0.434             | 6.44      | 6.74         | 8.47 | 1.032    | 0.563                 | 2.314                        | 1.303           | 1.075      |
|           | -              | 0      | 20     | 11.65  | 3.03  | 0.26                     | 0.354             | 5.55      | 6.39         | 8.00 | 1.035    | 0.577                 | 2.079                        | 1.199           | 0.889      |
|           | -              | 0      | 20     | 11.65  | 3.03  | 0.26                     | 0.434             | 6.44      | 6.74         | 8.47 | 1.032    | 0.563                 | 2.314                        | 1.303           | 0.933      |
|           | -              | 0      | 30     | 11.65  | 3.59  | 0.31                     | 0.354             | 5.55      | 6.39         | 8.00 | 1.035    | 0.577                 | 2.079                        | 1.200           | 0.742      |
|           | -              | 0      | 30     | 11.65  | 3.59  | 0.31                     | 0.434             | 6.44      | 6.74         | 8.47 | 1.032    | 0.563                 | 2.314                        | 1.303           | 0.799      |
|           | -              | 0      | 40     | 11.65  | 3.03  | 0.26                     | 0.354             | 5.55      | 6.39         | 8.00 | 1.035    | 0.577                 | 2.079                        | 1.200           | 0.568      |
|           | -              | 0      | 40     | 11.65  | 3.03  | 0.26                     | 0.434             | 6.44      | 6.74         | 8.47 | 1.032    | 0.563                 | 2.314                        | 1.303           | 0.605      |
|           | -              | 0      | 50     | 11.65  | 3.03  | 0.26                     | 0.354             | 5.55      | 6.39         | 8.00 | 1.035    | 0.577                 | 2.079                        | 1.200           | 0.357      |
|           | -              | 0      | 50     | 11.65  | 3.03  | 0.26                     | 0.434             | 6.44      | 6.74         | 8.47 | 1.032    | 0.563                 | 2.314                        | 1.303           | 0.381      |
|           | -              | 0      | 60     | 11.65  | 3.59  | 0.31                     | 0.354             | 5.55      | 6.39         | 8.01 | 1.035    | 0.577                 | 2.080                        | 1.200           | 0.183      |
|           | -              | 0      | 60     | 11.65  | 3.59  | 0.31                     | 0.434             | 6.44      | 6.74         | 8.47 | 1.032    | 0.563                 | 2.315                        | 1.304           | 0.203      |
|           | -              | 0      | 70     | 11.65  | 3.03  | 0.26                     | 0.434             | 6.44      | 6.74         | 8.48 | 1.032    | 0.563                 | 2.315                        | 1.305           | 0.071      |
|           | -              | 0      | 30     | 11.90  | 5.98  | 0.50                     | 0.434             | 6.44      | 6.74         | 8.47 | 1.032    | 0.568                 | 2.315                        | 1.314           | 0.745      |

| Type      | Key dimension  | Tilt   | Skew   | Offset | Gap  | Discharge per unit width |                   |           |              |       |          | Channel velocity head | Boundary layer velocity head | Attached uplift |            |
|-----------|----------------|--------|--------|--------|------|--------------------------|-------------------|-----------|--------------|-------|----------|-----------------------|------------------------------|-----------------|------------|
|           | $h_{ch}, R, r$ | $\phi$ | $\psi$ | $h$    | $s$  | $\beta$                  | $q$               | Depth $y$ | Velocity $V$ | $N$   | $\alpha$ | $\alpha^*$            | $h_v$                        | $h_v^*$         | $\Delta H$ |
|           | mm             | deg.   | deg.   | mm     | mm   | -                        | m <sup>2</sup> /s | cm        | m/s          | -     | -        | -                     | m                            | m               | m          |
| skewed    | -              | 0      | 45     | 2.91   | 3.12 | 1.07                     | 0.148             | 2.64      | 5.60         | 8.61  | 1.031    | 0.478                 | 1.600                        | 0.765           | 0.275      |
| slot      | -              | 0      | 45     | 2.91   | 3.12 | 1.07                     | 0.599             | 7.85      | 7.64         | 9.10  | 1.028    | 0.347                 | 2.974                        | 1.032           | 0.429      |
|           | -              | 0      | 45     | 1.17   | 3.12 | 2.67                     | 0.237             | 3.91      | 6.06         | 8.48  | 1.032    | 0.298                 | 1.870                        | 0.557           | 0.185      |
|           | -              | 0      | 45     | 1.17   | 3.12 | 2.67                     | 0.574             | 6.32      | 9.08         | 9.35  | 1.027    | 0.285                 | 4.208                        | 1.201           | 0.344      |
|           | -              | 0      | 45     | 1.17   | 3.12 | 2.67                     | 0.597             | 7.79      | 7.66         | 8.96  | 1.029    | 0.252                 | 2.995                        | 0.756           | 0.233      |
|           | -              | 0      | 45     | 1.17   | 3.12 | 2.67                     | 0.123             | 2.30      | 5.35         | 7.74  | 1.038    | 0.327                 | 1.459                        | 0.477           | 0.138      |
|           | -              | 0      | 45     | 4.37   | 3.12 | 0.72                     | 0.601             | 7.83      | 7.67         | 9.07  | 1.028    | 0.396                 | 3.001                        | 1.188           | 0.507      |
|           | -              | 0      | 45     | 4.37   | 3.12 | 0.72                     | 0.187             | 3.22      | 5.80         | 8.81  | 1.030    | 0.521                 | 1.713                        | 0.893           | 0.326      |
|           | -              | 0      | 45     | 4.37   | 3.12 | 0.72                     | 0.355             | 5.31      | 6.69         | 8.73  | 1.030    | 0.437                 | 2.282                        | 0.997           | 0.411      |
|           | -              | 0      | 45     | 11.96  | 3.12 | 0.26                     | 0.601             | 7.83      | 7.67         | 8.95  | 1.029    | 0.548                 | 2.999                        | 1.644           | 0.650      |
|           | -              | 0      | 45     | 11.96  | 3.12 | 0.26                     | 0.321             | 4.97      | 6.47         | 8.75  | 1.030    | 0.632                 | 2.132                        | 1.348           | 0.480      |
|           | -              | 0      | 45     | 9.68   | 3.12 | 0.32                     | 0.601             | 7.84      | 7.66         | 9.01  | 1.029    | 0.512                 | 2.995                        | 1.535           | 0.624      |
|           | -              | 0      | 45     | 9.68   | 3.12 | 0.32                     | 0.322             | 5.08      | 6.33         | 8.44  | 1.032    | 0.573                 | 2.043                        | 1.170           | 0.453      |
|           | -              | 0      | 45     | 0.74   | 3.12 | 4.24                     | 0.602             | 7.70      | 7.82         | 7.79  | 1.037    | 0.173                 | 3.118                        | 0.540           | 0.188      |
|           | -              | 0      | 45     | 0.74   | 3.12 | 4.24                     | 0.583             | 6.62      | 8.80         | 10.19 | 1.023    | 0.272                 | 3.953                        | 1.076           | 0.265      |
|           | -              | 0      | 45     | 0.74   | 3.12 | 4.24                     | 0.067             | 1.52      | 4.39         | 8.26  | 1.034    | 0.344                 | 0.983                        | 0.338           | 0.081      |
|           | -              | 0      | 30     | 2.90   | 5.81 | 2.01                     | 0.147             | 2.65      | 5.54         | 7.83  | 1.037    | 0.444                 | 1.563                        | 0.693           | 0.313      |
|           | -              | 0      | 30     | 2.90   | 5.81 | 2.01                     | 0.591             | 7.25      | 8.15         | 9.55  | 1.026    | 0.373                 | 3.389                        | 1.263           | 0.585      |
|           | -              | 0      | 30     | 11.96  | 5.81 | 0.49                     | 0.262             | 4.19      | 6.25         | 9.12  | 1.028    | 0.681                 | 1.993                        | 1.357           | 0.694      |
|           | -              | 0      | 30     | 11.96  | 5.81 | 0.49                     | 0.593             | 7.33      | 8.09         | 9.76  | 1.025    | 0.587                 | 3.335                        | 1.958           | 1.065      |
|           | -              | 0      | 30     | 5.79   | 5.81 | 1.00                     | 0.182             | 3.19      | 5.72         | 8.81  | 1.030    | 0.576                 | 1.670                        | 0.962           | 0.492      |
| -         | 0              | 30     | 5.79   | 5.81   | 1.00 | 0.596                    | 7.57              | 7.87      | 9.32         | 1.027 | 0.449    | 3.162                 | 1.420                        | 0.808           |            |
| tilt+skew | -              | 45     | 30     | 2.90   | 5.81 | 2.01                     | 0.275             | 4.33      | 6.37         | 8.72  | 1.030    | 0.406                 | 2.069                        | 0.841           | 0.489      |
|           | -              | 30     | 30     | 2.90   | 5.81 | 2.01                     | 0.275             | 4.33      | 6.37         | 8.72  | 1.030    | 0.406                 | 2.069                        | 0.841           | 0.429      |
|           | -              | 0      | 30     | 2.90   | 5.81 | 2.01                     | 0.275             | 4.33      | 6.37         | 8.72  | 1.030    | 0.406                 | 2.069                        | 0.841           | 0.379      |
|           | -              | -30    | 30     | 2.90   | 5.81 | 2.01                     | 0.275             | 4.33      | 6.37         | 8.72  | 1.030    | 0.406                 | 2.069                        | 0.841           | 0.351      |
|           | -              | -45    | 30     | 2.90   | 5.81 | 2.01                     | 0.275             | 4.33      | 6.37         | 8.72  | 1.030    | 0.406                 | 2.069                        | 0.841           | 0.316      |
|           | -              | 45     | 30     | 5.79   | 5.81 | 1.00                     | 0.275             | 4.33      | 6.37         | 8.72  | 1.030    | 0.516                 | 2.069                        | 1.067           | 0.646      |
|           | -              | 30     | 30     | 5.79   | 5.81 | 1.00                     | 0.275             | 4.33      | 6.37         | 8.72  | 1.030    | 0.516                 | 2.069                        | 1.067           | 0.615      |
|           | -              | 0      | 30     | 5.79   | 5.81 | 1.00                     | 0.275             | 4.33      | 6.37         | 8.72  | 1.030    | 0.516                 | 2.069                        | 1.067           | 0.579      |
|           | -              | -30    | 30     | 5.79   | 5.81 | 1.00                     | 0.275             | 4.33      | 6.37         | 8.72  | 1.030    | 0.516                 | 2.069                        | 1.067           | 0.486      |
|           | -              | -45    | 30     | 5.79   | 5.81 | 1.00                     | 0.275             | 4.33      | 6.37         | 8.72  | 1.030    | 0.516                 | 2.069                        | 1.067           | 0.428      |

| Type             | Key dimension  | Tilt   | Skew   | Offset | Gap   | Discharge per unit width |                   |           |              |      | Channel velocity head |            |       | Boundary layer velocity head | Attached uplift |
|------------------|----------------|--------|--------|--------|-------|--------------------------|-------------------|-----------|--------------|------|-----------------------|------------|-------|------------------------------|-----------------|
|                  | $h_{ch}, R, r$ | $\phi$ | $\psi$ | $h$    | $s$   | $\beta$                  | $q$               | Depth $y$ | Velocity $V$ | $N$  | $\alpha$              | $\alpha^*$ | $h_v$ | $h_v^*$                      | $\Delta H$      |
|                  | mm             | deg.   | deg.   | mm     | mm    | -                        | m <sup>2</sup> /s | cm        | m/s          | -    | -                     | -          | m     | m                            | m               |
| cracked concrete | -              | 0      | 0      | 11.39  | 17.46 | 1.53                     | 0.354             | 5.54      | 6.39         | 9.00 | 1.029                 | 0.607      | 2.081 | 1.263                        | 0.844           |
|                  | -              | 0      | 0      | 11.39  | 17.46 | 1.53                     | 0.434             | 6.43      | 6.75         | 9.14 | 1.028                 | 0.582      | 2.323 | 1.352                        | 0.903           |
|                  | -              | 0      | 0      | 11.39  | 17.46 | 1.53                     | 0.190             | 3.32      | 5.74         | 8.20 | 1.034                 | 0.699      | 1.678 | 1.173                        | 0.677           |
|                  | -              | 0      | 0      | 11.39  | 17.46 | 1.53                     | 0.231             | 3.70      | 6.23         | 8.32 | 1.033                 | 0.675      | 1.981 | 1.338                        | 0.770           |
|                  | -              | 0      | 0      | 11.39  | 17.46 | 1.53                     | 0.163             | 2.78      | 5.84         | 8.08 | 1.035                 | 0.743      | 1.741 | 1.293                        | 0.682           |
|                  | -              | 0      | 0      | 11.39  | 17.46 | 1.53                     | 0.285             | 4.59      | 6.21         | 8.69 | 1.031                 | 0.637      | 1.970 | 1.255                        | 0.786           |
|                  | -              | 0      | 0      | 11.39  | 17.46 | 1.53                     | 0.581             | 7.82      | 7.44         | 9.23 | 1.028                 | 0.550      | 2.820 | 1.549                        | 1.057           |
|                  | -              | 0      | 0      | 11.09  | 17.46 | 1.57                     | 0.165             | 2.83      | 5.85         | 8.01 | 1.035                 | 0.730      | 1.747 | 1.275                        | 0.709           |
|                  | -              | 0      | 0      | 11.09  | 17.46 | 1.57                     | 0.210             | 3.59      | 5.86         | 8.37 | 1.033                 | 0.678      | 1.750 | 1.186                        | 0.758           |
|                  | -              | 0      | 0      | 11.09  | 17.46 | 1.57                     | 0.433             | 6.36      | 6.82         | 8.94 | 1.029                 | 0.573      | 2.370 | 1.358                        | 0.926           |
|                  | -              | 0      | 0      | 11.09  | 17.46 | 1.57                     | 0.749             | 9.18      | 8.16         | 9.46 | 1.026                 | 0.525      | 3.392 | 1.781                        | 1.256           |
|                  | -              | 0      | 0      | 10.58  | 17.46 | 1.65                     | 0.213             | 3.82      | 5.58         | 5.25 | 1.074                 | 0.516      | 1.586 | 0.817                        | 0.468           |
|                  | -              | 0      | 0      | 10.58  | 17.46 | 1.65                     | 0.354             | 5.79      | 6.12         | 5.26 | 1.073                 | 0.407      | 1.910 | 0.777                        | 0.546           |
|                  | -              | 0      | 0      | 10.58  | 17.46 | 1.65                     | 0.586             | 8.18      | 7.16         | 5.51 | 1.068                 | 0.351      | 2.611 | 0.915                        | 0.695           |

**Table S2.** Joint flow test data

| Type   | Relief distance | Tilt   | Skew   | Offset | Gap   | $\beta$ | Joint thickness | Discharge per unit width | Depth | Velocity | $N$   | Net head                    | Joint flow | Discharge coefficient | $V_{gap}/V_{chute}$ |
|--------|-----------------|--------|--------|--------|-------|---------|-----------------|--------------------------|-------|----------|-------|-----------------------------|------------|-----------------------|---------------------|
|        | $r$             | $\phi$ | $\psi$ | $h$    | $s$   |         | $t$             | $q$                      | $y$   | $V$      |       | $\Delta H_{max} - \Delta H$ | $q_j$      | $C_d$                 |                     |
|        | mm              | deg.   | deg.   | mm     | mm    | -       |                 | m <sup>2</sup> /s        | cm    | m/s      | -     | m                           | L/s/m      | -                     | -                   |
| relief | 45.2            | 0      | 0      | 12.11  | 10.77 | 0.89    | 63.50           | 0.358                    | 5.48  | 6.53     | 8.76  | 0.450                       | 16.85      | 0.527                 | 0.239               |
| slot   | 45.2            | 0      | 0      | 12.11  | 10.77 | 0.89    | 63.50           | 0.358                    | 5.48  | 6.53     | 8.76  | 0.286                       | 11.17      | 0.438                 | 0.159               |
|        | 45.2            | 0      | 0      | 12.11  | 10.77 | 0.89    | 63.50           | 0.358                    | 5.48  | 6.53     | 8.76  | 0.188                       | 7.06       | 0.342                 | 0.100               |
|        | 45.2            | 0      | 0      | 12.11  | 10.77 | 0.89    | 63.50           | 0.358                    | 5.48  | 6.53     | 8.76  | 0.085                       | 2.82       | 0.203                 | 0.040               |
|        | 45.2            | 0      | 0      | 12.11  | 10.77 | 0.89    | 63.50           | 0.358                    | 5.48  | 6.53     | 8.76  | 0.085                       | 2.82       | 0.203                 | 0.040               |
| skewed | -               | 0      | 45     | 2.91   | 3.12  | 1.07    | 57.15           | 0.148                    | 2.64  | 5.60     | 8.61  | 0.322                       | 3.88       | 0.494                 | 0.222               |
|        | -               | 0      | 45     | 2.91   | 3.12  | 1.07    | 57.15           | 0.599                    | 7.85  | 7.64     | 9.10  | 0.439                       | 4.50       | 0.491                 | 0.189               |
|        | -               | 0      | 45     | 1.17   | 3.12  | 2.67    | 57.15           | 0.574                    | 6.32  | 9.08     | 9.35  | 0.421                       | 4.32       | 0.481                 | 0.152               |
|        | -               | 0      | 45     | 4.37   | 3.12  | 0.72    | 57.15           | 0.601                    | 7.83  | 7.67     | 9.07  | 0.479                       | 4.79       | 0.500                 | 0.200               |
|        | -               | 0      | 45     | 4.37   | 3.12  | 0.72    | 57.15           | 0.601                    | 7.83  | 7.67     | 9.07  | 0.744                       | 6.37       | 0.533                 | 0.266               |
|        | -               | 0      | 45     | 11.96  | 3.12  | 0.26    | 57.15           | 0.601                    | 7.83  | 7.67     | 8.95  | 0.560                       | 5.28       | 0.510                 | 0.221               |
|        | -               | 0      | 45     | 11.96  | 3.12  | 0.26    | 57.15           | 0.601                    | 7.83  | 7.67     | 8.95  | 1.037                       | 8.09       | 0.575                 | 0.338               |
|        | -               | 0      | 45     | 0.74   | 3.12  | 4.24    | 57.15           | 0.602                    | 7.70  | 7.82     | 7.79  | 0.354                       | 3.71       | 0.451                 | 0.152               |
|        | -               | 0      | 45     | 0.74   | 3.12  | 4.24    | 57.15           | 0.602                    | 7.70  | 7.82     | 7.79  | 0.276                       | 3.08       | 0.424                 | 0.126               |
|        | -               | 0      | 45     | 0.74   | 3.12  | 4.24    | 57.15           | 0.602                    | 7.70  | 7.82     | 7.79  | 0.150                       | 1.97       | 0.368                 | 0.081               |
|        | -               | 0      | 45     | 0.74   | 3.12  | 4.24    | 57.15           | 0.583                    | 6.62  | 8.80     | 10.19 | 0.171                       | 2.21       | 0.386                 | 0.080               |
|        | -               | 0      | 45     | 0.74   | 3.12  | 4.24    | 57.15           | 0.583                    | 6.62  | 8.80     | 10.19 | 0.338                       | 3.55       | 0.441                 | 0.129               |
|        | -               | 0      | 45     | 0.74   | 3.12  | 4.24    | 57.15           | 0.583                    | 6.62  | 8.80     | 10.19 | 0.405                       | 4.05       | 0.460                 | 0.147               |
|        | -               | 0      | 45     | 0.74   | 3.12  | 4.24    | 57.15           | 0.067                    | 1.52  | 4.39     | 8.26  | 0.247                       | 2.87       | 0.417                 | 0.209               |
|        | -               | 0      | 45     | 0.74   | 3.12  | 4.24    | 57.15           | 0.067                    | 1.52  | 4.39     | 8.26  | 0.160                       | 2.33       | 0.421                 | 0.170               |
|        | -               | 0      | 30     | 2.90   | 5.81  | 2.01    | 47.63           | 0.147                    | 2.65  | 5.54     | 7.83  | 0.105                       | 3.59       | 0.430                 | 0.112               |
|        | -               | 0      | 30     | 2.90   | 5.81  | 2.01    | 47.63           | 0.147                    | 2.65  | 5.54     | 7.83  | 0.716                       | 14.63      | 0.672                 | 0.455               |
|        | -               | 0      | 30     | 2.90   | 5.81  | 2.01    | 47.63           | 0.591                    | 7.25  | 8.15     | 9.55  | 0.162                       | 4.56       | 0.441                 | 0.096               |
|        | -               | 0      | 30     | 2.90   | 5.81  | 2.01    | 47.63           | 0.591                    | 7.25  | 8.15     | 9.55  | 0.561                       | 11.49      | 0.596                 | 0.243               |
|        | -               | 0      | 30     | 2.90   | 5.81  | 2.01    | 47.63           | 0.591                    | 7.25  | 8.15     | 9.55  | 1.007                       | 16.80      | 0.651                 | 0.355               |
| -      | 0               | 30     | 11.96  | 5.81   | 0.49  | 47.63   | 0.262           | 4.19                     | 6.25  | 9.12     | 0.486 | 12.63                       | 0.704      | 0.348                 |                     |
| -      | 0               | 30     | 11.96  | 5.81   | 0.49  | 47.63   | 0.262           | 4.19                     | 6.25  | 9.12     | 1.131 | 21.31                       | 0.779      | 0.586                 |                     |
| -      | 0               | 30     | 11.96  | 5.81   | 0.49  | 47.63   | 0.593           | 7.33                     | 8.09  | 9.76     | 0.245 | 7.99                        | 0.627      | 0.170                 |                     |
| -      | 0               | 30     | 11.96  | 5.81   | 0.49  | 47.63   | 0.593           | 7.33                     | 8.09  | 9.76     | 1.330 | 23.16                       | 0.780      | 0.493                 |                     |
| -      | 0               | 30     | 11.96  | 5.81   | 0.49  | 47.63   | 0.593           | 7.33                     | 8.09  | 9.76     | 1.614 | 25.33                       | 0.775      | 0.539                 |                     |

| Type             | Relief distance | Tilt   | Skew   | Offset | Gap   | Joint thickness | Discharge per unit width | Depth | Velocity | Net head | Joint flow | Discharge coefficient | $V_{gap}/V_{chute}$ |                             |       |
|------------------|-----------------|--------|--------|--------|-------|-----------------|--------------------------|-------|----------|----------|------------|-----------------------|---------------------|-----------------------------|-------|
|                  | $r$             | $\phi$ | $\psi$ | $h$    | $s$   |                 | $\beta$                  | $q$   | $y$      |          | $V$        | $N$                   |                     | $\Delta H_{max} - \Delta H$ | $q_j$ |
|                  | mm              | deg.   | deg.   | mm     | mm    | -               | m <sup>2</sup> /s        | cm    | m/s      | -        | m          | L/s/m                 | -                   | -                           |       |
| cracked concrete | -               | 0      | 0      | 11.25  | 17.46 | 1.55            | 57.87                    | 0.434 | 6.44     | 6.74     | 8.48       | 0.157                 | 6.84                | 0.223                       | 0.058 |
|                  | -               | 0      | 0      | 11.25  | 17.46 | 1.55            | 57.87                    | 0.434 | 6.44     | 6.74     | 8.48       | 0.191                 | 13.35               | 0.395                       | 0.113 |
|                  | -               | 0      | 0      | 11.25  | 17.46 | 1.55            | 57.87                    | 0.434 | 6.44     | 6.74     | 8.48       | 0.242                 | 19.73               | 0.518                       | 0.168 |
|                  | -               | 0      | 0      | 11.25  | 17.46 | 1.55            | 57.87                    | 0.434 | 6.44     | 6.74     | 8.48       | 0.497                 | 34.82               | 0.639                       | 0.296 |
|                  | -               | 0      | 0      | 11.25  | 17.46 | 1.55            | 57.87                    | 0.434 | 6.44     | 6.74     | 8.48       | 0.860                 | 47.07               | 0.657                       | 0.400 |
|                  | -               | 0      | 0      | 11.39  | 17.46 | 1.53            | 57.81                    | 0.434 | 6.43     | 6.75     | 9.14       | 0.032                 | 6.84                | 0.495                       | 0.058 |
|                  | -               | 0      | 0      | 11.39  | 17.46 | 1.53            | 57.81                    | 0.434 | 6.43     | 6.75     | 9.14       | 0.066                 | 13.35               | 0.674                       | 0.113 |
|                  | -               | 0      | 0      | 11.39  | 17.46 | 1.53            | 57.81                    | 0.434 | 6.43     | 6.75     | 9.14       | 0.117                 | 19.73               | 0.745                       | 0.167 |
|                  | -               | 0      | 0      | 11.39  | 17.46 | 1.53            | 57.81                    | 0.434 | 6.43     | 6.75     | 9.14       | 0.372                 | 34.82               | 0.738                       | 0.295 |
|                  | -               | 0      | 0      | 11.39  | 17.46 | 1.53            | 57.81                    | 0.434 | 6.43     | 6.75     | 9.14       | 0.735                 | 47.07               | 0.710                       | 0.399 |
|                  | -               | 0      | 0      | 11.09  | 17.46 | 1.57            | 57.95                    | 0.749 | 9.18     | 8.16     | 9.46       | 1.266                 | 42.73               | 0.491                       | 0.300 |
|                  | -               | 0      | 0      | 11.09  | 17.46 | 1.57            | 57.95                    | 0.749 | 9.18     | 8.16     | 9.46       | 0.636                 | 31.42               | 0.509                       | 0.221 |
|                  | -               | 0      | 0      | 10.58  | 17.46 | 1.65            | 58.21                    | 0.213 | 3.82     | 5.58     | 5.25       | 0.583                 | 37.56               | 0.636                       | 0.386 |
|                  | -               | 0      | 0      | 10.58  | 17.46 | 1.65            | 58.21                    | 0.213 | 3.82     | 5.58     | 5.25       | 0.367                 | 29.15               | 0.622                       | 0.299 |
|                  | -               | 0      | 0      | 10.58  | 17.46 | 1.65            | 58.21                    | 0.213 | 3.82     | 5.58     | 5.25       | 0.149                 | 18.03               | 0.604                       | 0.185 |
|                  | -               | 0      | 0      | 10.58  | 17.46 | 1.65            | 58.21                    | 0.213 | 3.82     | 5.58     | 5.25       | 0.048                 | 7.40                | 0.436                       | 0.076 |
|                  | -               | 0      | 0      | 10.58  | 17.46 | 1.65            | 58.21                    | 0.354 | 5.79     | 6.12     | 5.26       | 0.038                 | 4.70                | 0.311                       | 0.044 |
|                  | -               | 0      | 0      | 10.58  | 17.46 | 1.65            | 58.21                    | 0.354 | 5.79     | 6.12     | 5.26       | 0.206                 | 21.23               | 0.605                       | 0.199 |
|                  | -               | 0      | 0      | 10.58  | 17.46 | 1.65            | 58.21                    | 0.354 | 5.79     | 6.12     | 5.26       | 0.418                 | 30.84               | 0.617                       | 0.289 |
|                  | -               | 0      | 0      | 10.58  | 17.46 | 1.65            | 58.21                    | 0.354 | 5.79     | 6.12     | 5.26       | 0.631                 | 39.31               | 0.640                       | 0.368 |
|                  | -               | 0      | 0      | 10.58  | 17.46 | 1.65            | 58.21                    | 0.586 | 8.18     | 7.16     | 5.51       | 0.730                 | 41.34               | 0.626                       | 0.331 |
|                  | -               | 0      | 0      | 10.58  | 17.46 | 1.65            | 58.21                    | 0.586 | 8.18     | 7.16     | 5.51       | 0.405                 | 29.71               | 0.603                       | 0.238 |
|                  | -               | 0      | 0      | 10.58  | 17.46 | 1.65            | 58.21                    | 0.586 | 8.18     | 7.16     | 5.51       | 0.113                 | 13.17               | 0.507                       | 0.105 |
|                  | -               | 0      | 0      | 10.58  | 17.46 | 1.65            | 58.21                    | 0.586 | 8.18     | 7.16     | 5.51       | 0.030                 | 3.99                | 0.296                       | 0.032 |
